# Supplementary material for: Population Assessments of Federally Threatened Everglades Bully in Big Cypress National Preserve, Florida, USA, Using Habitat Suitability Modeling and Micromorphology
Source: MDPI journal article supplement (doi:10.3390/plants12071430), 2023-03-23
Supplement: s1 [file s1]

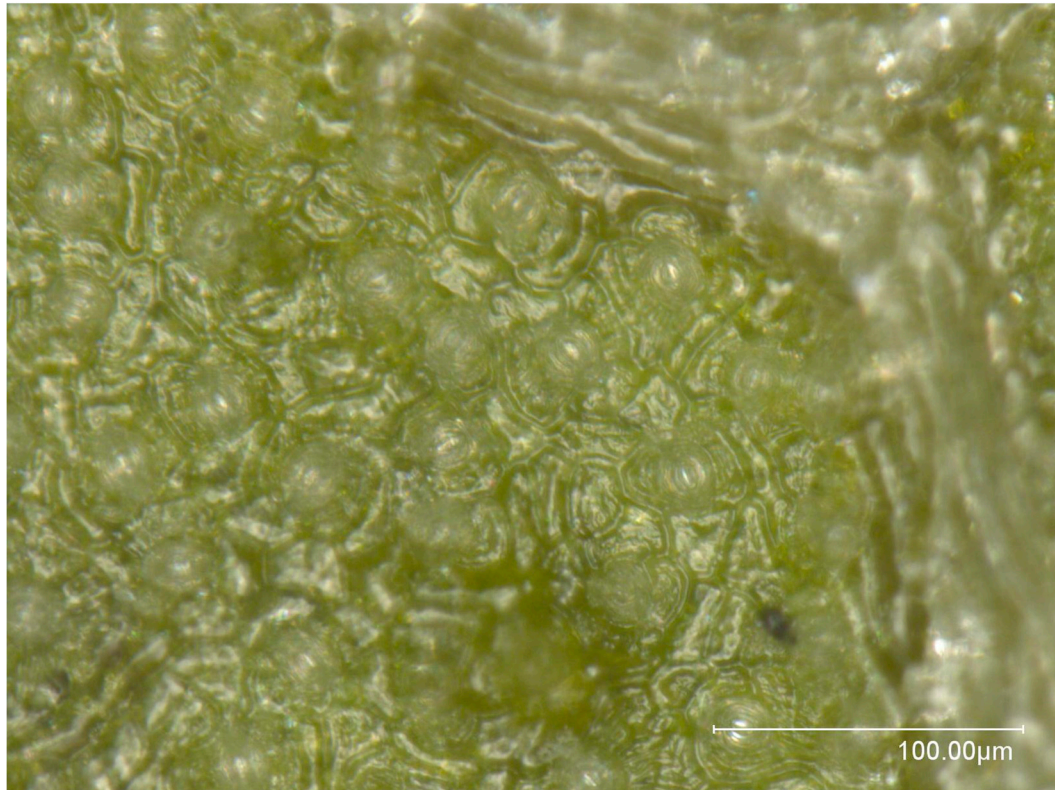

(a)

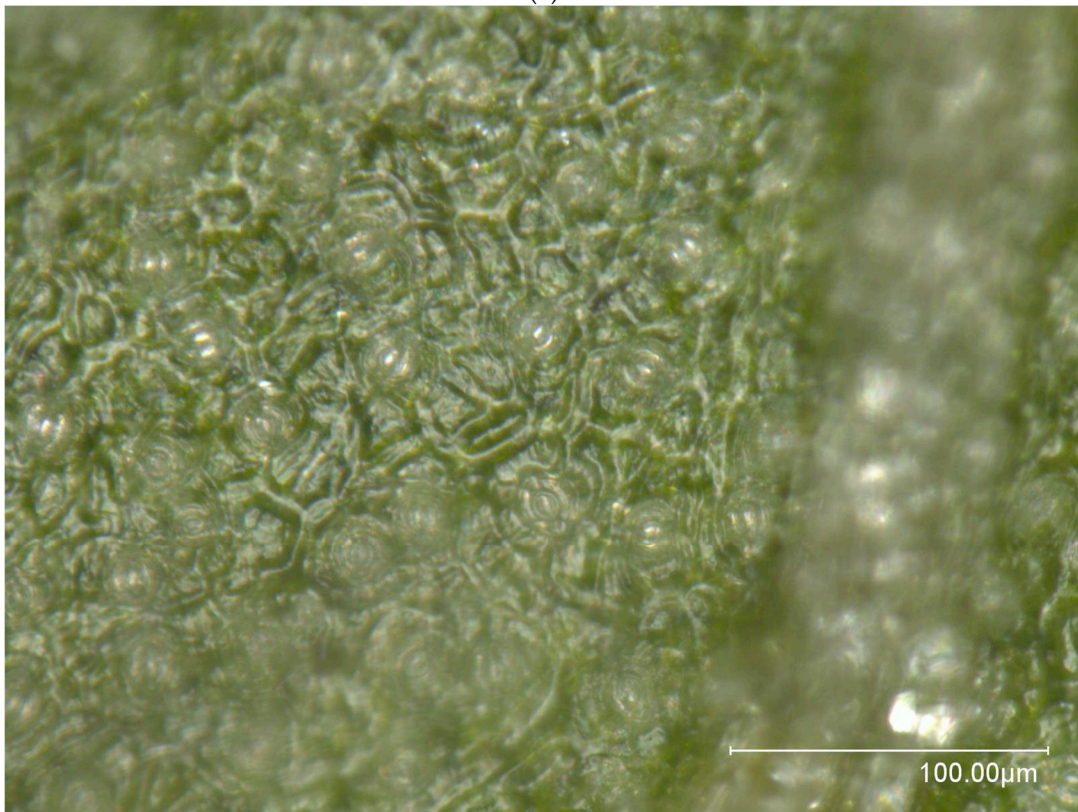

(b)

**Figure S1.** Comparative digital microscope imagery of abaxial laminar surfaces of separate specimens of (a) *S. reclinatum* subsp. *austrofloridense* and (b) *S. reclinatum* subsp. *reclinatum*.
